# Supplementary material
Source: PubMed Central journal article supplement (PMC4488387)
Supplement: NIHMS63067-supplement-1.pdf [file NIHMS63067-supplement-1.pdf]

## Supplementary Table 1

### pK<sub>i</sub> and reference values for compounds binding to Nluc-labeled A<sub>1</sub> and A<sub>3</sub> receptors

|             | Nluc-A <sub>1</sub> receptor |          |                                            |                  | Nluc-A <sub>3</sub> receptor |          |                                            |                  |
|-------------|------------------------------|----------|--------------------------------------------|------------------|------------------------------|----------|--------------------------------------------|------------------|
|             | pK <sub>i</sub> <sup>a</sup> | <i>n</i> | pK <sub>i</sub> in literature <sup>b</sup> | Ref <sup>b</sup> | pK <sub>i</sub> <sup>a</sup> | <i>n</i> | pK <sub>i</sub> in literature <sup>b</sup> | Ref <sup>b</sup> |
| DPCPX       | 8.17 ± 0.10                  | 5        | 7.4-9.2                                    | 23-27            | 6.93 ± 0.09                  | 4        | 5.4-6.6                                    | 27-32            |
| SCH 58261   | 6.65 ± 0.16                  | 4        | 6.1-6.3                                    | 33-35            | 6.80 ± 0.14                  | 4        | 5.9                                        | 33               |
| MRS 1220    | 6.89 ± 0.20                  | 4        | -                                          | -                | 9.20 ± 0.08                  | 3        | 8.2-9.2                                    | 36-39            |
| CGS 15943   | 8.04 ± 0.08                  | 4        | 8.5                                        | 34               | 8.12 ± 0.10                  | 4        | 7.0-7.9                                    | 30,32,34,37      |
| Propranolol | <5                           | 5        | -                                          | -                | <5                           | 3        | -                                          | -                |
| ZM 241385   | 5.85 ± 0.20                  | 5        | 6.1-6.6                                    | 33,34            | 6.63 ± 0.09                  | 3        | 6.1                                        | 33               |
| XAC         | 7.09 ± 0.19                  | 4        | 7.6                                        | 40               | 7.70 ± 0.13                  | 3        | 7.0-7.4                                    | 30-32            |
| PSB 603     | 6.33 ± 0.16                  | 4        | <5                                         | 41               | 6.31 ± 0.14                  | 4        | <5                                         | 41               |

<sup>a</sup> We obtained pK<sub>i</sub> values (mean ± s.e.m.) in the NanoBRET binding assay using whole, live HEK293 cells expressing Nluc-A<sub>1</sub> or Nluc-A<sub>3</sub> receptor and 25 nM CA200645.

<sup>b</sup> Previously published pK<sub>i</sub> values and associated references as listed in IUPHAR/BPS Guide to Pharmacology ([www.guidetopharmacology.org](http://www.guidetopharmacology.org)).

Note: Using <sup>3</sup>H-DPCPX in live CHO cells expressing the wild-type A<sub>1</sub> receptor, we have previously published pK<sub>i</sub> values for DPCPX, XAC and CGS15943 of 8.37 ± 0.03, 7.25 ± 0.02 and 8.35 ± 0.05 respectively<sup>13</sup>. These are very similar to the respective values quoted for Nluc-A<sub>1</sub> receptor with CA200645 above.

## Supplementary Table 2

### pK<sub>i</sub> values at Nluc-A<sub>1</sub> and Nluc-A<sub>3</sub> receptors using different fluorescent ligands

|             | Nluc-A <sub>1</sub> receptor |               | Nluc-A <sub>3</sub> receptor |               |                 |
|-------------|------------------------------|---------------|------------------------------|---------------|-----------------|
|             | ABEA-X-BY630                 |               | ABEA-X-BY630                 |               | AV039           |
|             | pK <sub>i</sub>              |               | pK <sub>i</sub>              |               | pK <sub>i</sub> |
|             | Co-addition                  | Preincubation | Co-addition                  | Preincubation | Co-addition     |
| CGS 15943   | 8.17 ± 0.25                  | 8.20 ± 0.12   | 7.54 ± 0.19                  | 7.87 ± 0.04   | 7.13 ± 0.14     |
| MRS 1220    | 6.97 ± 0.23                  | 7.31 ± 0.12   | 8.91 ± 0.14                  | 9.05 ± 0.07   | 8.26 ± 0.12     |
| SCH 58261   | 6.54 ± 0.21                  |               | 6.12 ± 0.06                  |               | 5.09 ± 0.06     |
| DPCPX       | 8.49 ± 0.13                  | 8.56 ± 0.11   | 6.02 ± 0.11                  | 6.54 ± 0.05   | 5.47 ± 0.17     |
| PSB 603     | 5.70 ± 0.13                  |               | 5.93 ± 0.13                  |               | 5.91 ± 0.09     |
| XAC         | 7.40 ± 0.12                  | 7.50 ± 0.13   | 6.96 ± 0.10                  | 7.44 ± 0.06   | 6.64 ± 0.11     |
| ZM 241385   | 6.33 ± 0.12                  |               | 6.03 ± 0.08                  |               | 5.49 ± 0.04     |
| propranolol | <5                           |               | <5                           |               | <5              |

We obtained pK<sub>i</sub> values (mean ± s.e.m.; n = 4) in the NanoBRET binding assay using whole, live HEK293 cells expressing Nluc-A<sub>1</sub> or Nluc-A<sub>3</sub> receptor. We used 250 nM ABEA-X-BY630 in Nluc-A<sub>1</sub> receptor-expressing cells, 50 nM ABEA-X-BY630 in Nluc-A<sub>3</sub> receptor-expressing cells and 10 nM AV039 in Nluc-A<sub>3</sub> receptor-expressing cells. We added unlabeled ligand simultaneously with fluorescent ligand (Co-addition). Alternatively, in order to check for differences in pK<sub>i</sub> values determined with the fluorescent agonist ABEA-X-BY630 due to simultaneous addition, we also investigated the values obtained for four antagonists following a 30 min preincubation with the antagonist prior to addition of ABEA-X-BY630 (Preincubation).

Note: Using <sup>3</sup>H-DPCPX in live CHO cells expressing the wild-type A<sub>1</sub> receptor, we have previously published pK<sub>i</sub> values for DPCPX, XAC and CGS15943 of 8.37 ± 0.03, 7.25 ± 0.02 and 8.35 ± 0.05 respectively<sup>13</sup>. These are very similar to the respective values quoted for Nluc-A<sub>1</sub> receptor with ABEA-X-BY630 above.

### Supplementary References:

21. Tannous, B.A. & Teng, J. *Biotechnol. Adv.* **29**, 997–1003 (2011).
22. Liu, J, O'Kane D.J., Escher, A. *Gene* **203**, 141–148 (1997).
23. de Ligt, R.A., Rivkees, S.A., Lorenzen, A., Leurs, R. & Ijzerman, A.P. *Eur. J. Pharmacol.* **510**, 1–8 (2005).
24. Iredale, P.A., Alexander, S.P. & Hill, S.J. *Br. J. Pharmacol.* **111**, 1252–1256 (1994).
25. Obiefuna, P.C. *et al. J. Pharmacol. Exp. Ther.* **315**, 329–336 (2005).
26. Rivkees, S.A., Barbhaiya, H. & AP, I.J. *J. Biol. Chem.* **274**, 3617–3621 (1999).
27. Weyler, S. *et al. ChemMedChem* **1**, 891–902 (2006).
28. Auchampach, J.A., Jin, X., Wan, T.C., Caughey, G.H. & Linden, J. *Mol. Pharmacol.* **52**, 846–860 (1997).
29. Hayallah, A.M. *et al. J. Med. Chem.* **45**, 1500–1510 (2002).
30. Klotz, K.N. *et al. Naunyn Schmiedebergs Arch. Pharmacol.* **357**, 1–9 (1998).
31. Salvatore, C.A., Jacobson, M.A., Taylor, H.E., Linden, J. & Johnson, R.G. *Proc. Natl. Acad. Sci. U S A* **90**, 10365–10369 (1993).
32. Varani, K. *et al. Mol. Pharmacol.* **57**, 968–975 (2000).
33. Jacobson, K.A. & Gao, Z.G. *Nat. Rev. Drug. Discov.* **5**, 247–264 (2006).
34. Ongini, E., Dionisotti, S., Gessi, S., Irenius, E. & Fredholm, B.B. *Naunyn Schmiedebergs Arch. Pharmacol.* **359**, 7–10 (1999).
35. Townsend-Nicholson, A. & Schofield, P.R. *J. Biol. Chem.* **269**, 2373–2376 (1994).
36. Jacobson, K.A. *et al. Neuropharmacology* **36**, 1157–1165 (1997).
37. Kim, Y.C., Ji, X.D. & Jacobson, K.A. *J. Med. Chem.* **39**, 4142–4148 (1996).
38. Sullivan, G.W., Rieger, J.M., Scheld, W.M., Macdonald, T.L. & Linden, J. *Br. J. Pharmacol.* **132**, 1017–1026 (2001).
39. Yates, L. *et al. Auton Autacoid Pharmacol.* **26**, 191–200 (2006).
40. Jockers, R. *et al. J. Biol. Chem.* **269**, 32077–32084 (1994).
41. Borrmann, T. *et al. J. Med. Chem.* **52**, 3994–4006 (2009).
